# Supplementary material
Source: MDPI journal article supplement (https://www.mdpi.com/1099-4300/24/9/1309)
Supplement: s1 [file s1]

Archive with 1 entries (1 files):
- entropy-1824911-supplementary-1 (1).pdf
